# Supplementary material for: Quantitative analysis of TALE–DNA interactions suggests polarity effects
Source: PubMed Central journal article supplement — Nucleic Acids Res. 2013 Feb 12;41(7):4118–28. doi: 10.1093/nar/gkt085 (PMC3627578; doi:10.1093/nar/gkt085), 2013-02-12
Supplement: supp_gkt085_nar-03135-h-2012-File007.pdf [file supp_gkt085_nar-03135-h-2012-File007.pdf]

## SUPPLEMENTARY DATA

### Quantitative Analysis of TALE-DNA Interactions Suggests Polarity Effects

Joshua F. Meckler<sup>1†</sup>, Mital S. Bhakta<sup>1†</sup>, Moon-Soo Kim<sup>1§</sup>, Robert Ovadia<sup>2</sup>, Chris H. Habrian<sup>2</sup>,  
Artem Zykovich<sup>1</sup>, Abigail Yu<sup>1</sup>, Sarah H. Lockwood<sup>1</sup>, Robert Morbitzer<sup>3</sup>, Janett Elsässer<sup>3</sup>,  
Thomas Lahaye<sup>3</sup>, David J. Segal<sup>1\*</sup> and Enoch P. Baldwin<sup>2\*</sup>

<sup>1</sup>Genome Center and Department of Biochemistry and Molecular Medicine, <sup>2</sup>Department of Molecular and Cellular Biology, University of California, Davis, CA 95616, <sup>3</sup>Department of Biology, Institute of Genetics, Ludwig-Maximilians-University Munich, 82152 Martinsried, Germany

<sup>§</sup>Current address: Department of Chemistry, 1906 College Heights Blvd., Western Kentucky University, Bowling Green, KY 42101.

<sup>†</sup>These authors contributed equally to this work

\*Address correspondence to: [djsegal@ucdavis.edu](mailto:djsegal@ucdavis.edu) and [epbaldwin@ucdavis.edu](mailto:epbaldwin@ucdavis.edu)

## Table of Contents

|                                                                                        |           |
|----------------------------------------------------------------------------------------|-----------|
| <b>Figure S1: Sequences of dTALEs used in this study. ....</b>                         | <b>3</b>  |
| <b>A) N- and C-terminal truncations reported by several studies. ....</b>              | <b>3</b>  |
| <b>B) Construct sequences for bacterial expression for <i>in vitro</i> assays.....</b> | <b>4</b>  |
| <b>C) Construct sequences for eukaryotic expression for reporter assays.....</b>       | <b>9</b>  |
| <b>Figure S2: Coomassie-stained protein gel of representative dTALEs. ....</b>         | <b>11</b> |
| <b>Figure S3. Representative EMSA data. ....</b>                                       | <b>12</b> |
| <b>Figure S4: Correlation of affinity with reporter gene activation. ....</b>          | <b>13</b> |
| <b>Table S1: Primers used to create N- and C-terminal truncations.....</b>             | <b>14</b> |
| <b>Table S2: Primers used in EMSA assays. ....</b>                                     | <b>15</b> |
| <b>Table S3: Primers for construction of ATF reporter plasmids. ....</b>               | <b>16</b> |
| <b>Table S4: EMSA and ATF data for G/A specificity of the NN RVD. ....</b>             | <b>19</b> |
| <b>Table S5: EMSA and ATF data probing the requirement of a 5'T. ....</b>              | <b>19</b> |
| <b>Table S6: EMSA and ATF data for polarity effects. ....</b>                          | <b>20</b> |
| <b>References.....</b>                                                                 | <b>21</b> |

## Figure S1: Sequences of dTALEs used in this study.

### A) N- and C-terminal truncations reported by several studies.

this study

Mussolino et al. (1)

Sun et al. (3)

Zhang et al. (5)

Miller et al. (2)

PthXo1 structure (4)

dHax3 structure (6)

BamHI

**254-this study**

| 287-Mussolino et al, Sun et al

||

MDPI

RPRRPSPARELLPGPQPDRVQPTADRGVSAPAGSPLDGLPARRTVSRTRL 201

207 Sun et al

PSPPAPSPAFSAGSFSDLLRPFDPSSLDTSSLDSMPAVGTPHTAAAPAEW 151

N2-Zhang et al

Factor Xa

**111-this study**

153-Mussolino et al

Δ152-Miller et al

| 135-Sun et al

DEAQSALRAADDPPPTVRVAVTAARPPRAKPAAPRRRAAQPSDASPAQVD 101

N3-Zhang et al

N5-Zhang et al

N6-Zhang et al

**94 this study**

| 125-Sun et al

N7-Zhang et al

PthXo1 Struct

N4-Zhang et al

LRTLGYSSQQQEQEKIKPKVVRSTVAQHHEALVGHGFTHAHIVALSQHPAALG 051

dHax3 Struct

N8-Zhang et al

| 50-Sun et al

| 49-Mussolino et al

TVAVTYQHIITALPEATHEDIVGVGKQWSGARALEALLTDAGELRGPPLQ 001

LDTGQ...

--- TALE REPEATS ---

...SRPDP

+28-Miller et al 47-Mussolino et al

| 31-Sun et al

| Factor Xa

| C4-Zhang et al

**42 this study**

| Factor Xa

| Factor Xa

| 17-Mussolino et al

ALAAL<sup>T</sup>NDHLVALACL<sup>G</sup>GR<sup>P</sup>AMDAV<sup>K</sup>KGLPHAP<sup>E</sup>LIR<sup>R</sup>VNR<sup>R</sup>RIGERTSHR 050

+63-Miller et al, Sun et al

| C3-Zhang et al

VADYAQVVRVLEFFQCHSHPAYAFDEAMTQFGMSRNLVQLFRRVGVTEL 100

117-Sun et al

EARGGTLPPASQRWDRILQASGMKRAKPSPTSAQTPDQASLHAFADSLER 150

163-Sun et al (imprecise due to low conservation with AvrXa10)

**180 this study**

| 200-Sun et al

DLDA<sup>P</sup>SPMHEGD<sup>Q</sup>TRASSR<sup>K</sup>RSRSDRAV<sup>T</sup>GPSAQ<sup>Q</sup>AVEV<sup>R</sup>VRPE<sup>Q</sup>RDALHL 200

BamHI

231-Mussolino et al

PLSWRVKRPRTRIWGLPDPGTPMAADLAASSTVMWEQDADPFAGAADD<sup>F</sup> 250

PAFN<sup>E</sup>EELAWLMELL<sup>P</sup>Q\*

## B) Construct sequences for bacterial expression for *in vitro* assays

Factor Xa site: IEGR<sup>^</sup>

TEV protease site: ENLYFQ<sup>^</sup>S

XhoI: **CTCGAG**

BamHI: **GGATCC**

StuI: **AGGCCT**

AatII: **GACGTC**

AgeI: **ACCGGT**

HindIII: **AAGCTT**

His6-purification tag: HHHHHH

Construct Schema:

MBP(not shown)-Factor Xa-TEV-XhoI**BamHI**-StuI-**TALE repeats**-AatII-AgeI-His6-Stop-**HindIII**

### AvrBs3<sub>254-180</sub> in pMal-TEV

ATCGAGGGAAGGCTCGAAAATCTTTATTTTCAGTCTCTCTCGAGGATCCATTTCGTTTCGCGCACACCAAGTCCTGCCCGCGAGCTTCTGCCCGGACCCCAACCCGATGGGGTTCAGCCGACTGCAGATCGTGGGGTGTCTCCGCCTGCCGGCGGCCCTGGATGGCTTGCCCGCTCGGCGGACGATGTCCCGGACCCGGCTGCCATCTCCCCCTGCCCCCTCACCTGCGTTC TCGGCGGGCAGCTTTCAGTGACCTGTTACGTACGTTTCGATCCGTCACCTTTTAAATACATCGCTTTTTGATTTCATTGCC TCCCTTCGGCGCTCACCATACAGAGGCTGCCACAGGCGAGTGGGATGAGGTGCAATCGGGTCTGCGGGCAGCCGACG CCCCCACCCACCATGCGCGTGGCTGTCACTGCCGCGCGGCCGCCGCGCCAAGCCGGCGCCGCGACGACGTGCT GCGCAACCCTCCGACGCTTTCGCCGGCCGCGCAGGTGGATCTACGCACGCTCGGCTACAGCCAGCAGCAACAGGAGAA GATCAAACCGAAGGTTTCGTTTCGACAGTGGCGCAGCACCACGAGGCACTGGTTCGGCCATGGGTTTACACACGCGCACA TCGTTGCGCTCAGCCAACACCCGGCAGCGTTAGGGACCGTTCGCTGTCAAGTATCAGGACATGATCGCAGCGTTGCCA GAGGCGACACACGAAGCGATCGTTGGCGTCGGCAAACAGTGGTCCGGCGCACGCGCTCTGGAGGCCTTGCTCACGGT GCGGGGAGAGTTGAGAGGTCCACCGTTACAGTTGGACACAGGCCAACTTCTCAAGATTGCAAAACGTGGCGGGCGTGA CCGCAGTGGAGGCAGTGCATGCATGGCGCAATGCACTGACGGGTGCCCCCTGAACCTGACCCCGGAGCAGGTGGTG GCCATCGCCAGCCACGATGGCGGCAAGCAGGCGCTGGAGACGGTGCAGCGGCTGTTGCCGGTGTGTGCCAGGCCCA TGGCCTGACCCCGCAGCAGGTGGTGGCCATCGCCAGCAATGGCGGTGGCAAGCAGGCGCTGGAGACGGTGCAGCGGC TGTTCGCCGGTGTGTGCCAGGCCCATGGCCTGACCCCGCAGCAGGTGGTGGCCATCGCCAGCAATAGCGGTGGCAAG CAGGCGCTGGAGACGGTGCAGCGGCTGTTGCCGGTGTGTGCCAGGCCCATGGCCTGACCCCGGAGCAGGTGGTGGC CATCGCTCGCAATGGCGGTGGCAAGCAGGCGCTGGAGACGGTGCAGCGGCTGTTGCCGGTGTGTGCCAGGCCCATG GCCTGACCCCGGAGCAGGTGGTGGCCATCGCCAGCAATATTGGTGGCAAGCAGGCGCTGGAGACGGTGCAGGCGCTG TTGCCGGTGTGTGCCAGGCCCATGGCCTGACCCCGGAGCAGGTGGTGGCCATCGCCAGCAATATTGGTGGCAAGCA GCGCTGGAGACGGTGCAGGCGCTGTTGCCGGTGTGTGCCAGGCCCATGGCCTGACCCCGGAGCAGGTGGTGGCCA TCGCCAGCAATATTGGTGGCAAGCAGGCGCTGGAGACGGTGCAGGCGCTGTTGCCGGTGTGTGCCAGGCCCATGGC CTGACCCCGGAGCAGGTGGTGGCCATCGCCAGCCACGATGGCGGCAAGCAGGCGCTGGAGACGGTGCAGCGGCTGTT GCCGGTGTGTGCCAGGCCCATGGCCTGACCCCGGAGCAGGTGGTGGCCATCGCCAGCCACGATGGCGGCAAGCAGG CGCTGGAGACGGTGCAGCGGCTGTTGCCGGTGTGTGCCAGGCCCATGGCCTGACCCCGCAGCAGGTGGTGGCCATC GCCAGCAATGGCGGTGGCAAGCAGGCGCTGGAGACGGTGCAGCGGCTGTTGCCGGTGTGTGCCAGGCCCATGGCCT GACCCCGGAGCAGGTGGTGGCCATCGCCAGCAATAGCGGTGGCAAGCAGGCGCTGGAGACGGTGCAGGCGCTGTTGC CGGTGTGTGCCAGGCCCATGGCCTGACCCCGGAGCAGGTGGTGGCCATCGCCAGCAATAGCGGTGGCAAGCAGGCG CTGGAGACGGTGCAGCGGCTGTTGCCGGTGTGTGCCAGGCCCATGGCCTGACCCCGGAGCAGGTGGTGGCCATCGC CAGCCACGATGGCGGCAAGCAGGCGCTGGAGACGGTGCAGCGGCTGTTGCCGGTGTGTGCCAGGCCCATGGCCTGA CCCCAGGACAGGTGGTGGCCATCGCCAGCCACGATGGCGGCAAGCAGGCGCTGGAGACGGTGCAGCGGCTGTTGCCG GTGCTGTGCCAGGCCCATGGCCTGACCCCGGAGCAGGTGGTGGCCATCGCCAGCCACGATGGCGGCAAGCAGGCGCT GGAGACGGTGCAGCGGCTGTTGCCGGTGTGTGCCAGGCCCATGGCCTGACCCCGCAGCAGGTGGTGGCCATCGCCA GCAATGGCGGCGGCAAGCAGGCGCTGGAGACGGTGCAGCGGCTGTTGCCGGTGTGTGCCAGGCCCATGGCCTGACC CCGGAGCAGGTGGTGGCCATCGCCAGCCACGATGGCGGCAAGCAGGCGCTGGAGACGGTGCAGCGGCTGTTGCCGGT GCTGTGCCAGGCCCATGGCCTGACCCCGCAGCAGGTGGTGGCCATCGCCAGCAATGGCGGCGGCAAGCAGGCGCTGG AGAGCATTGTTGCCAGTTATCTCGCCCTGATCCGGCGTTGGCCGCGTTGACCAACGACCACCTCGTCGCCTTGCC TGCCTCGGCGGACGTCCTGCGCTGGATGCAGTGAAAAGGGATTGCCGACGCGCCGGCCTTGATCAAAAAGAACCAA TCGCCGTATTCGGAACGCACATCCCATCGCGTTGCCGACCACGCGCAAGTGGTTTCGCGTGTGGGTTTTTTCCAGT GCCACTCCCACCCAGCGCAAGCATTGATGACGCCATGACGCAGTTCGGGATGAGCAGGCACGGGTTGTTACAGCTC





GCTGTGCCAGGCCCATGGCCTGACCCCGGAGCAGGTGGTGGCCATCGCCAGCCACGATGGCGGCAAGCAGGCGCTGG  
AGACGGTGCAGCGGCTGTTGCCGGTGCTGTGCCAGGCCCATGGCCTGACCCCGCAGCAGGTGGTGGCCATCGCCAGC  
AATGGCGGTGGCAAGCAGGCGCTGGAGACGGTGCAGCGGCTGTTGCCGGTGCTGTGCCAGGCCCATGGCCTGACCC  
GGAGCAGGTGGTGGCCATCGCCAGCAATAGCGGTGGCAAGCAGGCGCTGGAGACGGTGCAGGCGCTGTTGCCGGTG  
TGTGCCAGGCCCATGGCCTGACCCCGGAGCAGGTGGTGGCCATCGCCAGCAATAGCGGTGGCAAGCAGGCGCTGGAG  
ACGGTGCAGCGGCTGTTGCCGGTGCTGTGCCAGGCCCATGGCCTGACCCCGGAGCAGGTGGTGGCCATCGCCAGCCA  
CGATGGCGGCAAGCAGGCGCTGGAGACGGTGCAGCGGCTGTTGCCGGTGCTGTGCCAGGCCCATGGCCTGACCCCG  
AGCAGGTGGTGGCCATCGCCAGCCACGATGGCGGCAAGCAGGCGCTGGAGACGGTGCAGCGGCTGTTGCCGGTGCTG  
TGCCAGGCCCATGGCCTGACCCCGGAGCAGGTGGTGGCCATCGCCAGCCACGATGGCGGCAAGCAGGCGCTGGAGAC  
GGTGCAGCGGCTGTTGCCGGTGCTGTGCCAGGCCCATGGCCTGACCCCGCAGCAGGTGGTGGCCATCGCCAGCAATG  
GCGGCGGAGGCCGGCGCTGGAGACGGTGCAGCGGCTGTTGCCGGTGCTGTGCCAGGCCCATGGCCTGACCCCGGAG  
CAGGTGGTGGCCATCGCCAGCCACGATGGCGGCAAGCAGGCGCTGGAGACGGTGCAGCGGCTGTTGCCGGTGCTGTG  
CCAGGCCCATGGCCTGACCCCGCAGCAGGTGGTGGCCATCGCCAGCAATGGCGGCGGAGGCCGGCGCTGGAGAGCA  
TTGTTGCCAGTTATCTCGCCCTGATCCGGCGTTGGCCGCTTGACCAACGACCACCTCGTCGCCTTGGCCTGCCTC  
GGCGGACGTCCTGCCATGGATGCAGTAAAAAGGGACTGCCGCACGCGCCGAATTGATCAGAAGAGTCAATCGCCG  
TCCGGATCCTACCGGTCATCACCATCACCATCACTGAAGCTT

IEGRLENLYFOSLEMDPSOQQQEKIKPKVRSSTVAQHHEALVGHGFTHAHIVALSOHPAAL

GTVAVTYQHIITALPEATHEDIVGVGKQWSGARALEALLTVAGELRGPPLQ

LDTGQLLKIARKGGVTAVEAVHAWRNALTGAPLN

LTPEQVVAIASHDGGKQALETVQRLLPVLCQAHG

## II-NGp<sub>111-42</sub> in pMal-TEV

ATCGAGGGAAGGCTCGAAAATCTTTATTTTCAGTCTCTCGAGATGGATCCCTCCGACGCTTCGCCGGCCGCGCAGGT  
GGATCTACGCACGCTCGGCTACAGTCAGCAGCAGCAAGAGAAGATCAAACCGAAGGTGCGTTTCGACAGTGGCGCAGC  
ACCACGAGGCACTGGTGGGCCATGGGTTTACACACGCGCACATCGTTGCGCTCAGCCAACACCCGGCAGCGTTAGGG  
ACCGTCGCTGTACGTATCAGCACATAATCACGGCGTTGCCAGAGGCGACACACGAAGACATCGTTGGCGTCGGCAA  
ACAGTGGTCCGGCGCACGCGCCCTGGAGGCTTGCTCACGGTGGCGGGAGAGTTGAGAGGTCCACCGTTACAGTTGG  
ACACAGGCCAACTTCTCAAGATTGCAAAACGTGGCGGCGTGACCGCAGTGGAGGCAGTGCATGCATGGCGCAATGCA  
CTGACGGGTGCCCCCTGAACCTTACGCCGAGCAGGTGGTGGCCATCGCCAGCAATGGCGGTGGCAAGCAGGCGCT  
GGAGACGGTGCAGCGGCTGCTTCCGGTGCTGTGCCAGGCCCATGGCCTGACCCCGGAGCAGGTGGTGGCCATCGCCA  
GCAATATTGGTGGCAAGCAGGCGCTGGAGACGGTGCAGCGATTGTTGCCGGTGCTGTGCCAGGCCCATGGCCTGACC  
CCGGAGCAGGTGGTGGCCATCGCCAGCAATGGCGGTGGCAAGCAGGCGCTGGAGACTGTCCAGCGGCTGTTGCCGGT  
GCTGTGCCAGGCCCATGGCCTGACCCCGGAGCAGGTGGTGGCCATCGCCAGCAATGGCGGTGGCAAGCAGGCGCTTG  
AGACGGTGCAGCGGCTGTTGCCGGTGCTGTGCCAGGCCCATGGCCTGACCCCGGAGCAGGTGGTGGCCATCGCCAGC  
AATGGCGGTGGCAAGCAGGCTCTGGAGACGGTGCAGCGGCTGTTGCCGGTGCTGTGCCAGGCCCATGGCCTGACCC  
GGAGCAGGTGGTGGCCATCGCCAGCCACGACGGGGCAAGCAGGCGCTGGAGACGGTGCAGCGGCTGTTGCCGGTG

TGTGCCAGGCCCATGGCCTGACCCCGCAGCAGGTGGTGGCCATCGCCAGCAATGGCGGGCGCAAGCAGGCGCTGGAG  
ACGGTGCAGGCGCTGTTGCCGGTGTGTGCCAGGCCCATGGCCTGACCCCGGAGCAGGTGGTGGCCATCGCAAGCAA  
TAAGGGTGGCAAGCAGGCGCTGGAGACGGTGCAGGCGCTGTTGCCGGTGTGTGCCAGGCCCATGGCCTGACCCCGG  
AGCAGGTGGTGGCAATCGCCAGCAATGGCGGTGGCAAGCAGGCGCTGGAGACGGTGCAGCGGCTGTTGCCGGTGTGT  
TGCCAGGCCCATGGCCTGACCCCGCAACAGGTGGTAGCCATCGCCAGCAATATTGGTGGCAAGCAGGCGCTGGAGAC  
GGTGCAGCGGCTGTTGCCGGTGTGTGCCAGGCCCATGGCCTGACACCCAGCAGGTGGTAGCGATCGCCAGCAATG  
GCGGTGGCAAGCAGGCGCTGGAGACGGTGCAGCGGCTGCTTCCGGTGTGTGCCAGGCCCATGGCCTGACCCCGGAG  
CAGGTGGTGGCCATCGCCAGCCACGATGGCGGCAAGCAGGCGCTGGAGACGGTGCAGCGATTGTTGCCGGTGTGTG  
CCAGGCCCATGGCCTGACCCCGGAGCAGGTGGTGGCCATCGCCAGCAATGGCGGTGGCAAGCAGGCGCTGGAGACTG  
TCCAGCGGCTGTTGCCGGTGTGTGCCAGGCCCATGGCCTGACCCCGGAGCAGGTGGTGGCCATCGCCAGCAATGGC  
GGTGGCAAGCAGGCGCTTGGAGACGGTGCAGCGGCTGTTGCCGGTGTGTGCCAGGCCCATGGCCTGACCCCGGAGCA  
GGTGGTGGCCATCGCCAGCAATGGCGGTGGCAAGCAGGCTCTGGAGACGGTGCAGCGGCTGTTGCCGGTGTGTGCC  
AGGCCCATGGCCTGACCCCGGAGCAGGTGGTGGCCATCGCCAGCAATAAGGGGGCAAGCAGGCGCTGGAGACGGT  
CAGCGGCTGTTGCCGGTGTGTGCCAGGCCCATGGCCTGACCCCGCAGCAGGTGGTGGCCATCGCCAGCAATGGCGG  
CGGCAAGCAGGCGCTGGAGACGGTGCAGGCGCTGTTGCCGGTGTGTGCCAGGCCCATGGCCTGACACCCAGCAGG  
TGGTGGCCATCGCCAGCAATGGCGGGCGGAGGCGGCTGGAGAGCATTGTTGCCAGTTATCTCGCCCTGATCCG  
GCGTTGGCCGCTTGACCAACGACCACCTCGTCGCCTTGGCCTGCCTCGGCGGACGTCCTGCCATGGATGCAGTGAA  
AAAGGGACTGCCGCACGCGCCGAATTGATCAGAAGAGTCAATCGCCGTCCGGATCCTACCGGTTCATCACCATCACC  
ATCACTGAAGCTT

IEGRLENLYFQSLEMDPDSASPAAQVDLRTLGYSSQQQEKIKPKVRSSTVAQHHEALVGHG  
FTHAHIVALSQHPAALGTVAVTYQHIIITALPEATHEDIVGVGKQWSGARALEALLTVAGE  
LRGPPLQ

LDTGQLLKIARKGGVTAVEAVHAWRNALTGAPLN  
LTPQQVVAIASNNGGKQALETVORLLPVLCQAHG  
LTPEQVVAIASNIGGKQALETVORLLPVLCQAHG  
LTPQQVVAIASNNGGKQALETVORLLPVLCQAHG  
LTPQQVVAIASNNGGKQALETVORLLPVLCQAHG  
LTPQQVVAIASNNGGKQALETVORLLPVLCQAHG  
LTPQQVVAIASHDGGKQALETVORLLPVLCQAHG  
LTPQQVVAIASNNGGKQALETVQALLPVLCQAHG  
LTPQQVVAIASNKGKQALETVQALLPVLCQAHG  
LTPQQVVAIASNNGGKQALETVORLLPVLCQAHG  
LTPQQVVAIASNIGGKQALETVORLLPVLCQAHG  
LTPQQVVAIASNNGGKQALETVORLLPVLCQAHG  
LTPQQVVAIASHDGGKQALETVORLLPVLCQAHG  
LTPQQVVAIASNNGGKQALETVORLLPVLCQAHG  
LTPQQVVAIASNNGGKQALETVORLLPVLCQAHG  
LTPQQVVAIASNKGKQALETVORLLPVLCQAHG  
LTPQQVVAIASNNGGKQALETVQALLPVLCQAHG  
LTPQQVVAIASNNGGRPALESIVAQLSRPDPALAAALNDHLVALACLGRPAMDAVKKGLPHAPELIRRVNRRPDPT  
GHHHHHH\*KL



### C) Construct sequences for eukaryotic expression for reporter assays

HAtag: YPYDVPDYA  
NLS: PKKKRKV  
XhoI: CTCGAG  
StuI: AGGCCT  
AatII: GACGTC  
AgeI: ACCGGT  
VP64: DALDDFDLMDLDALDDFDLMDLDALDDFDLMDLDALDDFDLMDL  
PstI: CTGCAG

Construct Schema:

HAtag-NLS-XhoI-StuI-TALE\_repeats-AatII-AgeI-VP64-Stop-PstI

I-NGp<sub>111-42</sub> in pPGK-VP64

**ATGTACCCATACGATGTCCAGACTACGCGAATTCCCCGGGGATCCCAGGCATGGGGCCCAAAAAGAAACGCAAAGT**  
**TGGGCGCCTCGAGATGGATCCCTCCGACGCTTCGCCGGCCGCGCAGGTGGATCTACGCACGCTCGGCTACAGTCAGC**  
AGCAGCAAGAGAAGATCAAACCGAAGGTGCGTTTCGACAGTGGCGCAGCACCACGAGGCACTGGTGGGCCATGGGTTT  
ACACACGCGCACATCGTTGCGCTCAGCCAACACCCGGCAGCGTTAGGGACCGTGCCTGTCACGTATCAGCACATAAT  
CACGGCGTTGCCAGAGGCGACACACGAAGACATCGTTGGCGTCGGCAAACAGTGGTCCGGCGCACGCGCCCTGGAGG  
CCTTGCTCACGGTGGCGGGAGAGTTGAGAGGTCCACCGTTACAGTTGGACACAGGCCAACTTCTCAAGATTGCAAAA  
CGTGGCGGCGTGACCCAGTGGAGGCAAGTGCATGCATGGCGCAATGCACTGACGGGTGCCCCCTGAACCTTACGCC  
GCAGCAGGTGGTGGCCATCGCCAGCAATGGCGGTGGCAAGCAGGCGCTGGAGACGGTGCAGCGGCTGCTTCCGGTGC  
TGTGCCAGGCCCATGGCCTGACCCCGGAGCAGGTGGTGGCCATCGCCAGCAATATTGGTGGCAAGCAGGCGCTGGAG  
ACGGTGCAGCGATTGTTGCCGGTGTGTGCCAGGCCCATGGCCTGACCCCGGAGCAGGTGGTGGCCATCGCCAGCAA  
TGGCGGTGGCAAGCAGGCGCTGGAGACTGTCCAGCGGCTGTTGCCGGTGTGTGCCAGGCCCATGGCCTGACCCCGG  
AGCAGGTGGTGGCCATCGCCAGCCACGACGGTGGCAAGCAGGCGCTTGGAGACGGTGCAGCGGCTGTTGCCGGTGTGT  
TGCCAGGCCCATGGCCTGACCCCGGAGCAGGTGGTGGCCATCGCCAGCAATGGCGGTGGCAAGCAGGCTCTGGAGAC  
GGTGCAGCGGCTGTTGCCGGTGTGTGCCAGGCCCATGGCCTGACCCCGGAGCAGGTGGTGGCCATCGCCAGCAATA  
AGGGGGCAAGCAGGCGCTGGAGACGGTGCAGCGGCTGTTGCCGGTGTGTGCCAGGCCCATGGCCTGACCCCGCAG  
CAGGTGGTGGCCATCGCCAGCAATGGCGGGCGCAAGCAGGCGCTGGAGACGGTGCAGGCGCTGTTGCCGGTGTGTG  
CCAGGCCCATGGCCTGACCCCGGAGCAGGTGGTGGCCATCGCAAGCAATGGCGGTGGCAAGCAGGCGCTGGAGACGG  
TGCAGGCGCTGTTGCCGGTGTGTGCCAGGCCCATGGCCTGACCCCGGAGCAGGTGGTGGCAATCGCCAGCAATGGC  
GGTGGCAAGCAGGCGCTGGAGACGGTGCAGCGGCTGTTGCCGGTGTGTGCCAGGCCCATGGCCTGACCCCGCAACA  
GGTGTGAGCCATCGCCAGCAATATTGGTGGCAAGCAGGCGCTGGAGACGGTGCAGCGGCTGTTGCCGGTGTGTGCC  
AGGCCCATGGCCTGACACCCAGCAGGTGGTAGCGATCGCCAGCAATGGCGGTGGCAAGCAGGCGCTGGAGACGGT  
CAGCGGCTGCTTCCGGTGTGTGCCAGGCCCATGGCCTGACCCCGCAGCAGGTGGTGGCCATCGCCAGCAATGGCGG  
TGGCAAGCAGGCGCTGGAGACGGTGCAGCGATTGTTGCCGGTGTGTGCCAGGCCCATGGCCTGACCCCGGAGCAGG  
TGGTGGCCATCGCCAGCAATGGCGGTGGCAAGCAGGCGCTGGAGACTGTCCAGCGGCTGTTGCCGGTGTGTGCCAG  
GCCCATGGCCTGACCCCGGAGCAGGTGGTGGCCATCGCCAGCAATAAGGGTGGCAAGCAGGCGCTTGGAGACGGTGC  
GCGGCTGTTGCCGGTGTGTGCCAGGCCCATGGCCTGACCCCGGAGCAGGTGGTGGCCATCGCCAGCAATGGCGGT  
GCAAGCAGGCTCTGGAGACGGTGCAGCGGCTGTTGCCGGTGTGTGCCAGGCCCATGGCCTGACCCCGGAGCAGGT  
GTGGCCATCGCCAGCCACGACGGGGCAAGCAGGCGCTGGAGACGGTGCAGCGGCTGTTGCCGGTGTGTGCCAGGC  
CCATGGCCTGACCCCGCAGCAGGTGGTGGCCATCGCCAGCAATGGCGGGCGCAAGCAGGCGCTGGAGACGGTGCAGG  
CGCTGTTGCCGGTGTGTGCCAGGCCCATGGCCTGACACCCAGCAGGTGGTGGCCATCGCCAGCAATGGCGGGCGG  
AGGCCGGCGCTGGAGACGATTGTTGCCAGTTATCTCGCCCTGATCCGGCGTTGGCCGCGTTGACCAACGACCACCT  
CGTCGCCTTGGCCTGCCTCGGCGGACGTCCTGCCATGGATGCAGTGAAAAAGGGACTGCCGCACGCGCCGGAATTGA  
TCAGAAGATCAATCGCCGTCGGATCCTACCGGTGCGGCCGCCGACGCTTTGGATGACTTTGATTTGGACATGCTG  
GATGCTCTAGACTTTCGACCTGGATATGCTGGACGCACTTGGACGACTTTGACCTCGACATGCTAGACGCTCTGGA  
CGACTTCGATCTAGACATGCTCTAAGTCGACCTGCAG

**MPYDVPDYAN**SPGIPGMG**PKKKRKV**GRLEMDPSDASPAAQVDLRTLGYSSQQQEKIKPK  
VRSTVAQHHEALVGHGFTHAHIVALSQHPAALGTVAVTYQHIITALPEATHEDIVGVGKQ  
WSGARALEALLTVAGELRGPPLQ  
LDTGQLLKIARKGGVTAVEAVHAWRNALTGAPLN  
LTPQQVVAIASNGGKQALETVQRLLPVLCQAHG

LTPEQVVAIASNIGGKQALETVORLLPVLCQAHG  
LTPEQVVAIASNNGGKQALETVORLLPVLCQAHG  
LTPEQVVAIASHDGGKQALETVORLLPVLCQAHG  
LTPEQVVAIASNNGGKQALETVORLLPVLCQAHG  
LTPEQVVAIASNKGGKQALETVORLLPVLCQAHG  
LTPQQVVAIASNNGGKQALETVQALLPVLCQAHG  
LTPEQVVAIASNNGGKQALETVQALLPVLCQAHG  
LTPEQVVAIASNNGGKQALETVORLLPVLCQAHG  
LTPQQVVAIASNIGGKQALETVORLLPVLCQAHG  
LTPQQVVAIASNNGGKQALETVORLLPVLCQAHG  
LTPQQVVAIASNNGGKQALETVORLLPVLCQAHG  
LTPEQVVAIASNNGGKQALETVORLLPVLCQAHG  
LTPEQVVAIASNKGGKQALETVORLLPVLCQAHG  
LTPEQVVAIASNNGGKQALETVORLLPVLCQAHG  
LTPEQVVAIASHDGGKQALETVORLLPVLCQAHG  
LTPQQVVAIASNNGGKQALETVQALLPVLCQAHGLTPQQVVAIASNNGGRPALESIVAQ  
LSRPDPALAALTNDHLVALACLGGRPAMDAVKKGLPHAPELIRRVRPDPTGAAADALD  
DFDLMDALDDFDLMDALDDFDLMDALDDFDLMDL\*VDLQ

**Figure S2: Coomassie-stained protein gel of representative dTALEs.**

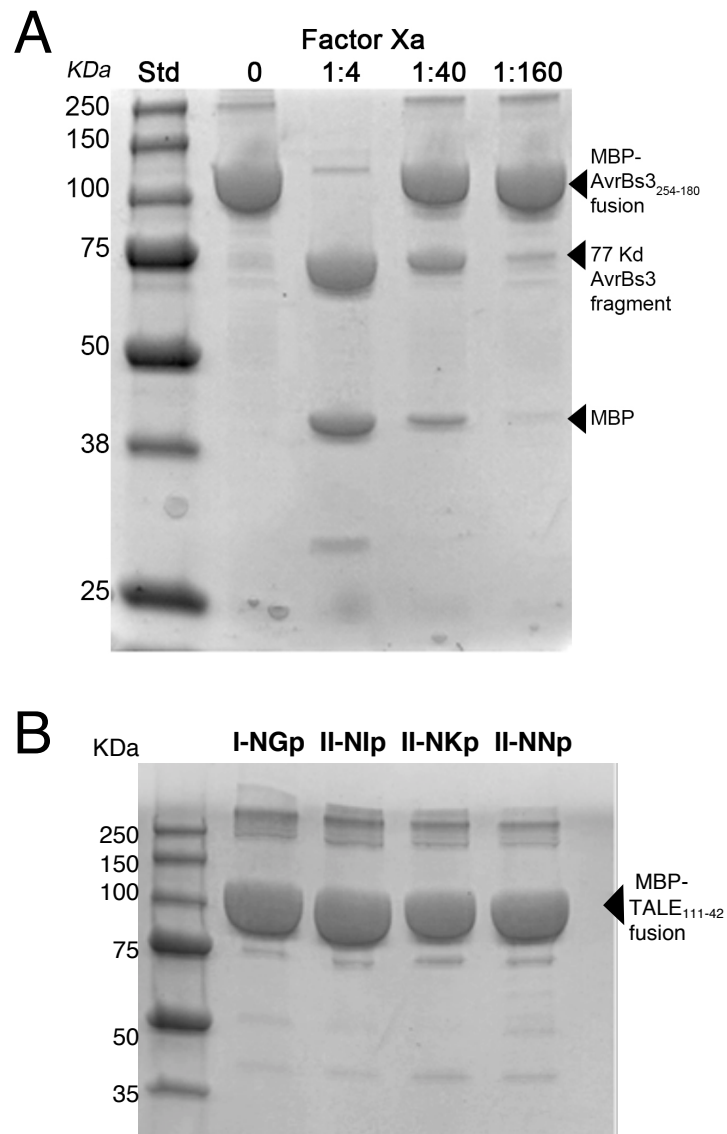

A) Coomassie-stained SDS PAGE gel shows purified **AvrBs3**<sub>254-180</sub> after treatment with various concentrations of Factor Xa protease. B) Purified dTALE<sub>111-42</sub> proteins run at the expected 100 kilodalton size. Proteins shown are diluted 1:5 from stock. Typical protein yields were between 10 and 30  $\mu$ M.

**Figure S3. Representative EMSA data.**

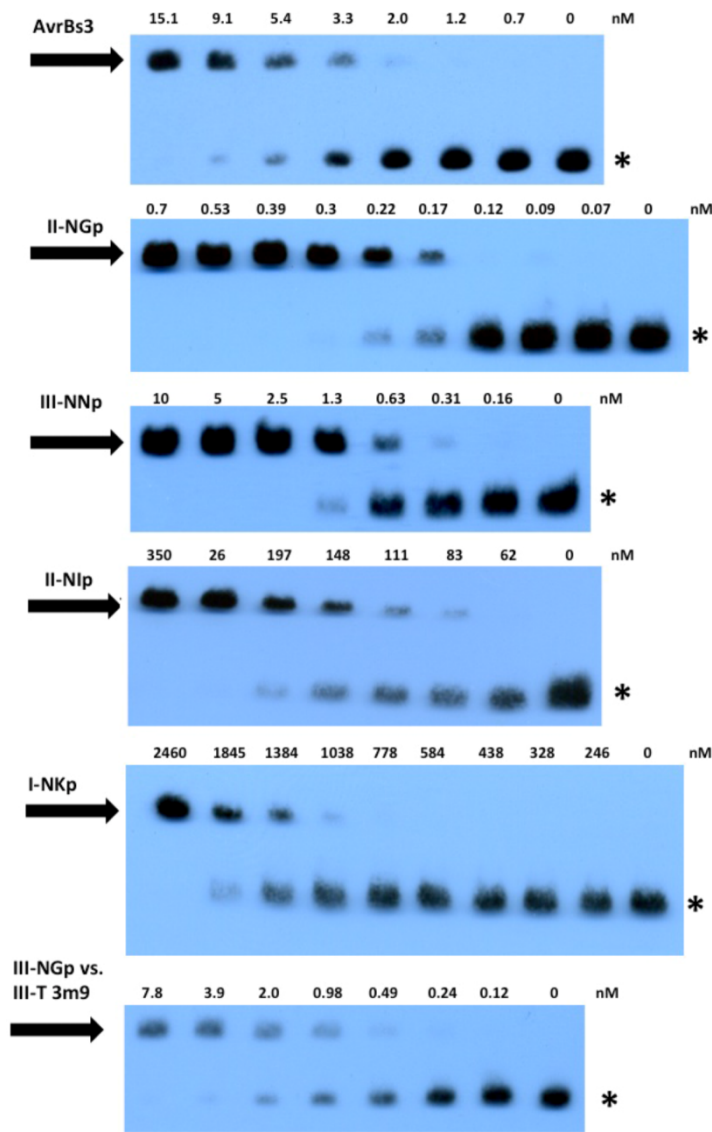

Sample data showing the EMSA dynamic range of  $10^4$ . The TALEs used are shown and unless stated, the cognate DNA targets are used. The shifted TALE-DNA band is indicated with an arrow while the unshifted DNA is indicated with a “\*”. The bottom panel shows representative data for a mixed site target used in polarity experiments. The sharpness of the transition (apparent  $nH = 3-4$ ) is consistent over 4 logs of protein concentration, and therefore is not due to lack of equilibration or protein concentration-dependent aggregation. We do not know its origin.

**Figure S4: Correlation of affinity with reporter gene activation.**

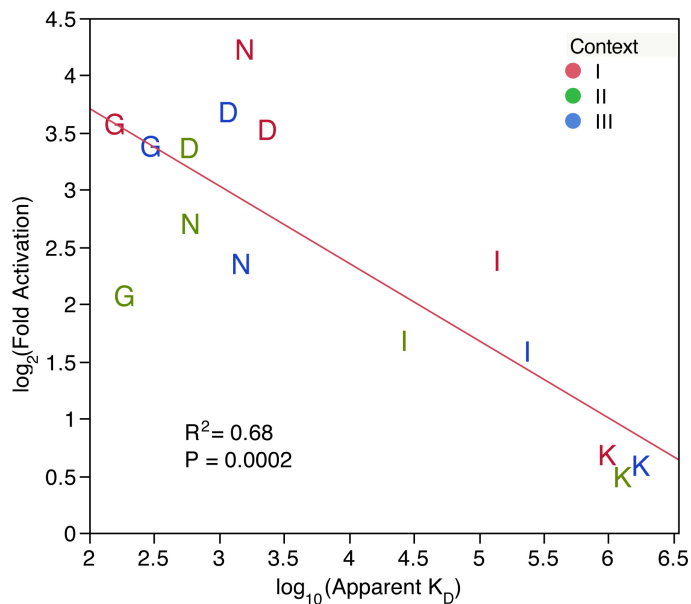

The relationship between apparent  $K_D$  and fold activation of the reporter gene was not linear.

The best fit model of these data was a log-log relationship. The correlation of  $\log_2(\text{Fold}$

Activation) versus  $\log_{10}(\text{Apparent } K_D \text{ (pM)})$  had an  $R^2 = 0.68$  and a  $P = 0.0002$ . Host context is

indicated by color, guest RVD by letter; G, NG; N, NN; D, HD; I, NI; K, NK.

## Table S1: Primers used to create N- and C-terminal truncations.

EcoRI: GAATTC

5'SfiI: GGCCGCTAAGGCC

3'SfiI: GGCCAAGCTGGCC

XhoI: CTCGAG

BamHI: GGATCC

SmaI: CCCGGG

AgeI: ACCGGT

>PthXoI\_5'111-f

5'-

AATAGGAGGTGCACCGAATTCGTGGCCGCTAAGGCCCTCGAGATGGATCC

>PthXoI\_5'94-f

5'-

AATAGGAGGTGCACCGAATTCGTGGCCGCTAAGGCCCTCGAGATGGATCCAGTCAGCAGCAGCAAGAGAAGATCAAA  
CC

>PthXoI\_5'end-r

5'-CGACGAGGTGGTTCGTTGGTCAACGCCCGGGCTGTAACGGCGGACCTCTCAACTC

>PthXoI\_3'end-f

5'-GAGTTGAGAGGTCCGCCGTTACAGCCCGGGCGTTGACCAACGACCACCTCGTCG

>PthXoI\_3'42-r

5'-

CAAGAAAGCTGGGTCTGAATTCGGCCAAGCTGGCCTTACCGGTAGGATCCGGACGGCGATTGACTCTTCTGATCAATT  
C

**Table S2: Primers used in EMSA assays.**

Biotinylated forward primer /5Biosg/CCTCTTCGCTATTACGCCAGC  
 Reverse primer CACCCTGACTCGAGTACGATCGAACGTTTC

For RVD affinity studies

|       |                       |                      |                                |
|-------|-----------------------|----------------------|--------------------------------|
| I-A   | CCTCTTCGCTATTACGCCAGC | TAAACAGATAAATAGACAA  | GAACGTTTCGATCGTACTCGAGTCAGGGTG |
| I-G   | CCTCTTCGCTATTACGCCAGC | TGAGCGGGTGAGTGGGCGG  | GAACGTTTCGATCGTACTCGAGTCAGGGTG |
| I-C   | CCTCTTCGCTATTACGCCAGC | TCACCCGCTCACTCGCCCC  | GAACGTTTCGATCGTACTCGAGTCAGGGTG |
| I-T   | CCTCTTCGCTATTACGCCAGC | TTATCTGTTTTATTTGTCTT | GAACGTTTCGATCGTACTCGAGTCAGGGTG |
| II-A  | CCTCTTCGCTATTACGCCAGC | TAAATACAGAAACATAGAA  | GAACGTTTCGATCGTACTCGAGTCAGGGTG |
| II-G  | CCTCTTCGCTATTACGCCAGC | TGAGTGCGGGAGCGTGGGG  | GAACGTTTCGATCGTACTCGAGTCAGGGTG |
| II-C  | CCTCTTCGCTATTACGCCAGC | TCACTCCCGCACCCCTCGCC | GAACGTTTCGATCGTACTCGAGTCAGGGTG |
| II-T  | CCTCTTCGCTATTACGCCAGC | TTATTTCTGTATCTTTGTT  | GAACGTTTCGATCGTACTCGAGTCAGGGTG |
| III-A | CCTCTTCGCTATTACGCCAGC | TACAAAGACATAGAAATAA  | GAACGTTTCGATCGTACTCGAGTCAGGGTG |
| III-G | CCTCTTCGCTATTACGCCAGC | TGCGAGGGCGTGGGAGTGG  | GAACGTTTCGATCGTACTCGAGTCAGGGTG |
| III-C | CCTCTTCGCTATTACGCCAGC | TCCCACGCCCTCGCACTCC  | GAACGTTTCGATCGTACTCGAGTCAGGGTG |
| III-T | CCTCTTCGCTATTACGCCAGC | TTCTATGTCTTTGTATTTT  | GAACGTTTCGATCGTACTCGAGTCAGGGTG |

Zif268 CCTCTTCGCTATTACGCCAGC GCGTGGGCGT GAACGTTTCGATCGTACTCGAGTCAGGGTG

For 5'T studies

|     |                       |                     |                                |
|-----|-----------------------|---------------------|--------------------------------|
| Bs3 | CCTCTTCGCTATTACGCCAGC | TATATAAACCTAACCATCC | GAACGTTTCGATCGTACTCGAGTCAGGGTG |
| 5'A | CCTCTTCGCTATTACGCCAGC | AATATAAACCTAACCATCC | GAACGTTTCGATCGTACTCGAGTCAGGGTG |
| 5'C | CCTCTTCGCTATTACGCCAGC | CATATAAACCTAACCATCC | GAACGTTTCGATCGTACTCGAGTCAGGGTG |
| 5'G | CCTCTTCGCTATTACGCCAGC | GATATAAACCTAACCATCC | GAACGTTTCGATCGTACTCGAGTCAGGGTG |

For polarity studies (B = C,G,T; D = A,G,T; H = A,C,T; V = A,C,G)

Bs3 variants

|     |                       |                     |                                |
|-----|-----------------------|---------------------|--------------------------------|
| 3m3 | CCTCTTCGCTATTACGCCAGC | TATATAAACCTAACCAVDD | GAACGTTTCGATCGTACTCGAGTCAGGGTG |
| 3m6 | CCTCTTCGCTATTACGCCAGC | TATATAAACCTAADDVDD  | GAACGTTTCGATCGTACTCGAGTCAGGGTG |
| 3m9 | CCTCTTCGCTATTACGCCAGC | TATATAAACCVBBDDBVDD | GAACGTTTCGATCGTACTCGAGTCAGGGTG |
| 5m3 | CCTCTTCGCTATTACGCCAGC | TBVBTAACCTAACCATCC  | GAACGTTTCGATCGTACTCGAGTCAGGGTG |
| 5m6 | CCTCTTCGCTATTACGCCAGC | TBVBVBACCTAACCATCC  | GAACGTTTCGATCGTACTCGAGTCAGGGTG |
| 5m9 | CCTCTTCGCTATTACGCCAGC | TBVBVBBDDBTAACCATCC | GAACGTTTCGATCGTACTCGAGTCAGGGTG |

III-C variants

|     |                       |                     |                                |
|-----|-----------------------|---------------------|--------------------------------|
| 3m3 | CCTCTTCGCTATTACGCCAGC | TCCCACGCCCTCGCACVDD | GAACGTTTCGATCGTACTCGAGTCAGGGTG |
| 3m6 | CCTCTTCGCTATTACGCCAGC | TCCCACGCCCTCGDBDVDD | GAACGTTTCGATCGTACTCGAGTCAGGGTG |
| 3m9 | CCTCTTCGCTATTACGCCAGC | TCCCACGCCVVDHDBDVDD | GAACGTTTCGATCGTACTCGAGTCAGGGTG |
| 5m3 | CCTCTTCGCTATTACGCCAGC | TDDDACGCCCTCGCACTCC | GAACGTTTCGATCGTACTCGAGTCAGGGTG |
| 5m6 | CCTCTTCGCTATTACGCCAGC | TDDDBDHCCCTCGCACTCC | GAACGTTTCGATCGTACTCGAGTCAGGGTG |
| 5m9 | CCTCTTCGCTATTACGCCAGC | TDDDBDHDDDTCGCACTCC | GAACGTTTCGATCGTACTCGAGTCAGGGTG |

III-T variants

|     |                       |                      |                                |
|-----|-----------------------|----------------------|--------------------------------|
| 3m3 | CCTCTTCGCTATTACGCCAGC | TTCTATGTCTTTGTATVVV  | GAACGTTTCGATCGTACTCGAGTCAGGGTG |
| 3m6 | CCTCTTCGCTATTACGCCAGC | TTCTATGTCTTTGVBVVVV  | GAACGTTTCGATCGTACTCGAGTCAGGGTG |
| 3m9 | CCTCTTCGCTATTACGCCAGC | TTCTATGTCTVVHVVBVVVV | GAACGTTTCGATCGTACTCGAGTCAGGGTG |
| 5m3 | CCTCTTCGCTATTACGCCAGC | TVDVATGTCCTTTGTATTTT | GAACGTTTCGATCGTACTCGAGTCAGGGTG |
| 5m6 | CCTCTTCGCTATTACGCCAGC | TVDVBVHTCTTTGTATTTT  | GAACGTTTCGATCGTACTCGAGTCAGGGTG |
| 5m9 | CCTCTTCGCTATTACGCCAGC | TVDVBVHVDVTTGTATTTT  | GAACGTTTCGATCGTACTCGAGTCAGGGTG |

### Table S3: Primers for construction of ATF reporter plasmids.

XhoI: **CTCGAG**  
NotI: **GCGGCCGC**

#### For RVD studies

>pGL3-control-Not-F  
5'- GAGGAG**GCGGCCGC**CAATAAAATATCTTTATTTTC

>PGL3-I-A-R  
5'- CTCCTC**CTCGAG**TTGTCTATTTATCTGTTTACCCGGGCTAGCACGCGTAAGAGCTC -3'

>PGL3-I-G-R  
5'- CTCCTC**CTCGAG**CCGCCACTCACCCGCTCACCCGGGCTAGCACGCGTAAGAGCTC -3'

>PGL3-I-C-R  
5'- CTCCTC**CTCGAG**GGGGCGAGTGAGCGGGTGACCCGGGCTAGCACGCGTAAGAGCTC -3'

>PGL3-I-T-R  
5'- CTCCTC**CTCGAGA**AAGACAAATAAACAGATAACCCGGGCTAGCACGCGTAAGAGCTC -3'

>PGL3-II-A-R  
5'- CTCCTC**CTCGAG**TTCTATGTTTCTGTATTTACCCGGGCTAGCACGCGTAAGAGCTC -3'

>PGL3-II-G-R  
5'- CTCCTC**CTCGAG**CCCCACGCTCCCGCACTCACCCGGGCTAGCACGCGTAAGAGCTC -3'

>PGL3-II-C-R  
5'- CTCCTC**CTCGAG**GGCGAGGGTGCGGGAGTGACCCGGGCTAGCACGCGTAAGAGCTC -3'

>PGL3-II-T-R  
5'- CTCCTC**CTCGAGA**ACAAAGATACAGAAATAACCCGGGCTAGCACGCGTAAGAGCTC -3'

>PGL3-III-A-R  
5'- CTCCTC**CTCGAG**TTATTTCTATGTCTTTGTACCCGGGCTAGCACGCGTAAGAGCTC -3'

>PGL3-III-G-R  
5'- CTCCTC**CTCGAG**CCACTCCCACGCCCTCGCACCCGGGCTAGCACGCGTAAGAGCTC -3'

>PGL3-III-C-R  
5'- CTCCTC**CTCGAG**GGAGTGCGAGGGCGTGGGACCCGGGCTAGCACGCGTAAGAGCTC -3'

>PGL3-III-T-R  
5'- CTCCTC**CTCGAG**AAAATACAAAGACATAGAACCCGGGCTAGCACGCGTAAGAGCTC -3'

#### For AvrBs3 variant studies

>PGL3-Bs3-wt-R  
5'- CTCCTC**CTCGAG**GGATGGTTAGGTTTATATAACCCGGGCTAGCACGCGTAAGAGCTC -3'

>pGL3-Bs3-UPA-R  
5'- CTCCTC**CTCGAG**AGAGGGTTAGGTTTATATAACCCGGGCTAGCACGCGTAAGAGCTC -3'



For AvrBs3 5'T studies

>PGL3-Bs3-5A-R  
5'- CTCCTCCTCGAGGGATGGTTAGGTTTATATTCCCGGGCTAGCACGCGTAAGAGCTC -3'  
>PGL3-Bs3-5C-R  
5'- CTCCTCCTCGAGGGATGGTTAGGTTTATATGCCCGGGCTAGCACGCGTAAGAGCTC -3'  
>PGL3-Bs3-5G-R  
5'- CTCCTCCTCGAGGGATGGTTAGGTTTATATCCCGGGCTAGCACGCGTAAGAGCTC -3'

For polarity studies

>PGL3-Bs3-3m3-R  
5'- CTCCTCCTCGAGCCCTGGTTAGGTTTATATACCCGGGCTAGCACGCGTAAGAGCTC -3'  
>PGL3-Bs3-3m6-R  
5'- CTCCTCCTCGAGCCCCCTTAGGTTTATATACCCGGGCTAGCACGCGTAAGAGCTC -3'  
>PGL3-Bs3-3m9-R  
5'- CTCCTCCTCGAGCCCCCAACGGTTTATATACCCGGGCTAGCACGCGTAAGAGCTC -3'  
>PGL3-Bs3-5m3-R  
5'- CTCCTCCTCGAGGGATGGTTAGGTTTAACCACCCGGGCTAGCACGCGTAAGAGCTC -3'  
>PGL3-Bs3-5m6-R  
5'- CTCCTCCTCGAGGGATGGTTAGGTAACACCACCCGGGCTAGCACGCGTAAGAGCTC -3'  
>PGL3-Bs3-5m9-R  
5'- CTCCTCCTCGAGGGATGGTTACCAAACACCACCCGGGCTAGCACGCGTAAGAGCTC -3'  
>PGL3-III-T-3m3-R  
5'- CTCCTCCTCGAGCCCATACAAAGACATAGAACCCGGGCTAGCACGCGTAAGAGCTC -3'  
>PGL3-III-T-3m6-R  
5'- CTCCTCCTCGAGCCCCACCAAAGACATAGAACCCGGGCTAGCACGCGTAAGAGCTC -3'  
>PGL3-III-T-3m9-R  
5'- CTCCTCCTCGAGCCCCACGCCAGACATAGAACCCGGGCTAGCACGCGTAAGAGCTC -3'  
>PGL3-III-T-5m3-R  
5'- CTCCTCCTCGAGAAAATACAAAGACATCCCACCCGGGCTAGCACGCGTAAGAGCTC -3'  
>PGL3-III-T-5m6-R  
5'- CTCCTCCTCGAGAAAATACAAAGAGCACCCACCCGGGCTAGCACGCGTAAGAGCTC -3'  
>PGL3-III-T-5m9-R  
5'- CTCCTCCTCGAGAAAATACAACCCGCACCCACCCGGGCTAGCACGCGTAAGAGCTC -3'

Alignment

|                 |                              |
|-----------------|------------------------------|
| >PGL3-Bs3-UPA-R | TATATAAACCTAACCTCT           |
| >PGL3-Bs3-wt-R  | TATATAAACCTAACCATCC          |
| >PGL3-Bs3-5A-R  | <u>A</u> AATATAAACCTAACCATCC |
| >PGL3-Bs3-5C-R  | <u>C</u> ATATAAACCTAACCATCC  |

|                          |                            |
|--------------------------|----------------------------|
| >PGL3- <i>Bs3</i> -5G-R  | <u>GATATAAACCTAACCATCC</u> |
| >PGL3-I-A-R              | TAAACAGATAAATAGACAA        |
| >PGL3-I-G-R              | TGAGCGGGTGAGTGGGCGG        |
| >PGL3-I-C-R              | TCACCCGCTCACTCGCCCC        |
| >PGL3-I-T-R              | TTATCTGTTTATTTGTCTT        |
| >PGL3-II-A-R             | TAAATACAGAAACATAGAA        |
| >PGL3-II-G-R             | TGAGTGCGGGAGCGTGGGG        |
| >PGL3-II-C-R             | TCACTCCCGCACCCCTCGCC       |
| >PGL3-II-T-R             | TTATTTCTGTATCTTTGTT        |
| >PGL3-III-A-R            | TACAAAGACATAGAAATAA        |
| >PGL3-III-G-R            | TGCGAGGGCGTGGGAGTGG        |
| >PGL3-III-C-R            | TCCCACGCCCTCGCACTCC        |
| >PGL3-III-T-R            | TTCTATGTCTTTGTATTTT        |
| >PGL3- <i>Bs3</i> -wt-R  | TATATAAACCTAACCATCC        |
| >PGL3- <i>Bs3</i> -3m3-R | TATATAAACCTAACCAGGG        |
| >PGL3- <i>Bs3</i> -3m6-R | TATATAAACCTAAGGGGGG        |
| >PGL3- <i>Bs3</i> -3m9-R | TATATAAACCGTTGGGGGG        |
| >PGL3- <i>Bs3</i> -5m3-R | TGGTTAAACCTAACCATCC        |
| >PGL3- <i>Bs3</i> -5m6-R | TGGTGTTACCTAACCATCC        |
| >PGL3- <i>Bs3</i> -5m9-R | TGGTGTTTGGTAACCATCC        |
| >PGL3-III-T-wt-R         | TTCTATGTCTTTGTATTTT        |
| >PGL3-III-T-3m3-R        | TTCTATGTCTTTGTATGGG        |
| >PGL3-III-T-3m6-R        | TTCTATGTCTTTGGTGGGG        |
| >PGL3-III-T-3m9-R        | TTCTATGTCTGGCGTGGGG        |
| >PGL3-III-T-5m3-R        | TGGGATGTCTTTGTATTTT        |
| >PGL3-III-T-5m6-R        | TGGGTGCTCTTTGTATTTT        |
| >PGL3-III-T-5m9-R        | TGGGTGCGGGTTGTATTTT        |

**Table S4: EMSA and ATF data for G/A specificity of the NN RVD.**

| dTALE   | Target Site | Apparent $K_D$ (nM) | Fold increase in apparent $K_D$ over G guest | Fold Activation | Fold decrease in activation over G guest |
|---------|-------------|---------------------|----------------------------------------------|-----------------|------------------------------------------|
| I-NNp   | I-G         | $1.3 \pm 0.3$       |                                              | $5.1 \pm 0.4$   |                                          |
| I-NNp   | I-A         | $64 \pm 5$          | 49                                           | $0.86 \pm 0.17$ | 6                                        |
| II-NNp  | II-G        | $1.3 \pm 0.3$       |                                              | $19 \pm 2$      |                                          |
| II-NNp  | II-A        | $53 \pm 11$         | 41                                           | $2.4 \pm 0.1$   | 8                                        |
| III-NNp | III-G       | $0.6 \pm 0.2$       |                                              | $6.5 \pm 0.9$   |                                          |
| III-NNp | III-A       | $10 \pm 4$          | 17                                           | $0.53 \pm 0.03$ | 12                                       |

**Table S5: EMSA and ATF data probing the requirement of a 5'T.**

| Protein                   | 5' Base | Apparent $K_D$ (nM) | Fold increase in apparent $K_D$ compared to 5' T | % affinity of 5' T control** | Fold Activation | Fold decrease in activation compared to 5' T |
|---------------------------|---------|---------------------|--------------------------------------------------|------------------------------|-----------------|----------------------------------------------|
| AvrBs3 <sub>111-42</sub>  | T       | $1.1 \pm 0.04^*$    |                                                  | 100                          | $3.9 \pm 0.6$   |                                              |
| AvrBs3 <sub>111-42</sub>  | A       | $16 \pm 4.8$        | 15                                               | $7.5 \pm 2.6$                | $1.1 \pm 0.1$   | 3.5                                          |
| AvrBs3 <sub>111-42</sub>  | C       | $22 \pm 0.7$        | 20                                               | $5.0 \pm 0.1$                | $1.2 \pm 0.2$   | 3.3                                          |
| AvrBs3 <sub>111-42</sub>  | G       | $21 \pm 6.4$        | 19                                               | $5.4 \pm 1.3$                | $1.0 \pm 0.2$   | 3.9                                          |
| dAvrBs3 <sub>111-42</sub> | T       | $2.6 \pm 1.5^*$     |                                                  | 100                          | $4.7 \pm 0.3$   |                                              |
| dAvrBs3 <sub>111-42</sub> | A       | $4.3 \pm 0.3$       | 1.7                                              | $36 \pm 3$                   | $3.5 \pm 0.3$   | 1.3                                          |
| dAvrBs3 <sub>111-42</sub> | C       | $9.6 \pm 3.7$       | 3.7                                              | $40 \pm 13$                  | $3.4 \pm 0.3$   | 1.4                                          |
| dAvrBs3 <sub>111-42</sub> | G       | $8.4 \pm 0.4$       | 3.2                                              | $43 \pm 2$                   | $3.1 \pm 0.5$   | 1.5                                          |

\* These values of AvrBs3<sub>111-42</sub> and dAvrBs3<sub>111-42</sub> binding to the *Bs3* targets represent the average of two independent EMSA experiments performed on the same days as other individual determinations in the table. The values differ from that in Table 1, but were included in the computation of the Table 1 value.

\*\* Percentage affinities of 5' A, C and G were calculated using the values for AvrBs3<sub>111-42</sub> or dAvrBs3<sub>111-42</sub> binding to *Bs3* (5' T) targets, determined on the same day, as a reference.

**Table S6: EMSA and ATF data for polarity effects.**

| <b>Protein</b>            | <b>Target</b> | <b>Apparent<br/>K<sub>D</sub> (nM)</b> | <b>% wild type<br/>K<sub>A</sub></b> | <b>Fold<br/>Activation</b> |
|---------------------------|---------------|----------------------------------------|--------------------------------------|----------------------------|
| III-HDp                   | wt            | 0.6 ± 0.1                              | 100                                  | n.d.                       |
| III-HDp                   | 5m3           | 35 ± 3.7                               | 1.7 ± 0.3                            | n.d.                       |
| III-HDp                   | 5m6           | 530 ± 134                              | 0.12 ± 0.02                          | n.d.                       |
| III-HDp                   | 5m9           | >1650                                  | <0.04                                | n.d.                       |
| III-HDp                   | 3m3           | 1.7 ± 1.0                              | 44 ± 21                              | n.d.                       |
| III-HDp                   | 3m6           | 39 ± 28                                | 2.4 ± 1.9                            | n.d.                       |
| III-HDp                   | 3m9           | 68 ± 23                                | 0.91 ± 0.16                          | n.d.                       |
|                           |               |                                        |                                      |                            |
| III-NGp                   | wt            | 0.3 ± 0.1                              | 100                                  | 4.3 ± 0.45                 |
| III-NGp                   | 5m3           | 4.2 ± 0.7                              | 6.5 ± 2.9                            | 0.35 ± 0.09                |
| III-NGp                   | 5m6           | 100 ± 10                               | 0.27 ± 0.13                          | 0.18 ± 0.02                |
| III-NGp                   | 5m9           | 320 ± 76                               | 0.08 ± 0.03                          | 0.14 ± 0.04                |
| III-NGp                   | 3m3           | 0.3 ± 0.1                              | 95 ± 8.8                             | 3.1 ± 1.4                  |
| III-NGp                   | 3m6           | 0.5 ± 0.2                              | 49 ± 11                              | 5.3 ± 1.4                  |
| III-NGp                   | 3m9           | 2.5 ± 1.1                              | 12 ± 6                               | 1.6 ± 0.33                 |
|                           |               |                                        |                                      |                            |
| AvrBs3 <sub>111-42</sub>  | wt            | 5.4 ± 2.6                              | 100                                  | 3.9 ± 0.32                 |
| AvrBs3 <sub>111-42</sub>  | 5m3           | 115 ± 11                               | 3.4 ± 1.2                            | 1.2 ± 0.07                 |
| AvrBs3 <sub>111-42</sub>  | 5m6           | >1500                                  | <0.25                                | 1.1 ± 0.15                 |
| AvrBs3 <sub>111-42</sub>  | 5m9           | >1500                                  | <0.25                                | 1.2 ± 0.17                 |
| AvrBs3 <sub>111-42</sub>  | 3m3           | 140 ± 78                               | 4.4 ± 2.1                            | 1.3 ± 0.03                 |
| AvrBs3 <sub>111-42</sub>  | 3m6           | 490 ± 48                               | 0.77 ± 0.18                          | 1.0 ± 0.22                 |
| AvrBs3 <sub>111-42</sub>  | 3m9           | 970 ± 64                               | 0.58 ± 0.29                          | 1.1 ± 0.08                 |
|                           |               |                                        |                                      |                            |
| dAvrBs3 <sub>111-42</sub> | wt            | 3.2 ± 0.7                              | 100                                  | 4.7 ± 0.35                 |
| dAvrBs3 <sub>111-42</sub> | 5m3           | 1100 ± 85                              | 0.29 ± 0.04                          | 0.52 ± 0.05                |
| dAvrBs3 <sub>111-42</sub> | 5m6           | >1500                                  | <0.22                                | 0.55 ± 0.04                |
| dAvrBs3 <sub>111-42</sub> | 5m9           | >1500                                  | <0.22                                | 0.60 ± 0.04                |
| dAvrBs3 <sub>111-42</sub> | 3m3           | 46 ± 12                                | 7.4 ± 2.7                            | 1.4 ± 0.06                 |
| dAvrBs3 <sub>111-42</sub> | 3m6           | 120 ± 23                               | 2.7 ± 0.59                           | 1.2 ± 0.15                 |
| dAvrBs3 <sub>111-42</sub> | 3m9           | 93 ± 5.3                               | 3.5 ± 0.66                           | 1.0 ± 0.08                 |
|                           |               |                                        |                                      |                            |
| n.d., not done            |               |                                        |                                      |                            |

## References

1. Mussolino, C. and Cathomen, T. (2012) TALE nucleases: tailored genome engineering made easy. *Curr Opin Biotechnol*.
2. Miller, J.C., Tan, S., Qiao, G., Barlow, K.A., Wang, J., Xia, D.F., Meng, X., Paschon, D.E., Leung, E., Hinkley, S.J. *et al.* (2011) A TALE nuclease architecture for efficient genome editing. *Nat Biotechnol*, **29**, 143-148.
3. Sun, N., Liang, J., Abil, Z. and Zhao, H. (2012) Optimized TAL effector nucleases (TALENs) for use in treatment of sickle cell disease. *Mol Biosyst*, **8**, 1255-1263.
4. Mak, A.N., Bradley, P., Cernadas, R.A., Bogdanove, A.J. and Stoddard, B.L. (2012) The crystal structure of TAL effector PthXo1 bound to its DNA target. *Science*, **335**, 716-719.
5. Zhang, F., Cong, L., Lodato, S., Kosuri, S., Church, G.M. and Arlotta, P. (2011) Efficient construction of sequence-specific TAL effectors for modulating mammalian transcription. *Nat Biotechnol*, **29**, 149-153.
6. Deng, D., Yan, C., Pan, X., Mahfouz, M., Wang, J., Zhu, J.K., Shi, Y. and Yan, N. (2012) Structural basis for sequence-specific recognition of DNA by TAL effectors. *Science*, **335**, 720-723.
